# Supplementary material for: Pharmacological BACE1 and BACE2 inhibition induces hair depigmentation by inhibiting PMEL17 processing in mice
Source: PubMed Central journal article supplement (PMC4766495; doi:10.1038/srep21917), 2016-02-25
Supplement: srep21917-s1.pdf [file srep21917-s1.pdf]

## **Supplementary Figures and Figure Legends**

### **Pharmacological BACE1 and BACE2 inhibition induces hair depigmentation by inhibiting PMEL17 processing in mice**

Derya R. Shimshek<sup>1+</sup>, Laura H. Jacobson<sup>1\*</sup>, Carine Kolly<sup>2</sup>, Natasa Zamurovic<sup>2</sup>, Kamal Kumar Balavenkatraman<sup>2</sup>, Laurent Morawiec<sup>2</sup>, Robert Kreutzer<sup>2</sup>, Juliane Schelle<sup>5</sup>, Mathias Jucker<sup>5</sup>, Barbara Bertschi<sup>2</sup>, Diethilde Theil<sup>2</sup>, Annabelle Heier<sup>2</sup>, Karine Bigot<sup>2</sup>, Karen Beltz<sup>3</sup>, Rainer Machauer<sup>4</sup>, Irena Brzak<sup>1</sup>, Ludovic Perrot<sup>1</sup> and Ulf Neumann<sup>1</sup>

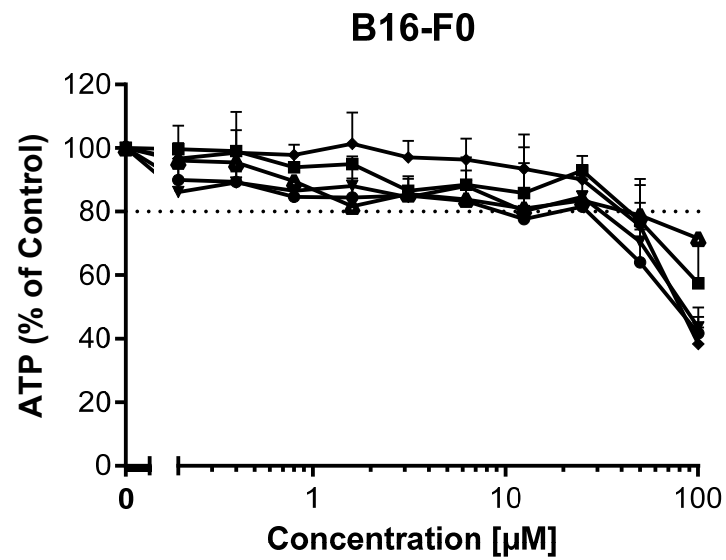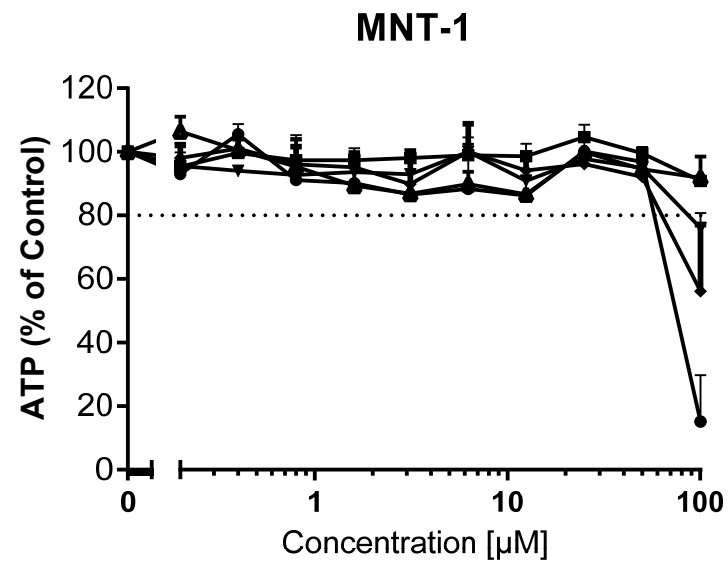

NB-449   
  NB-360   
  NB-444   
  NB-109   
  DAPT

Supplementary Figure 1

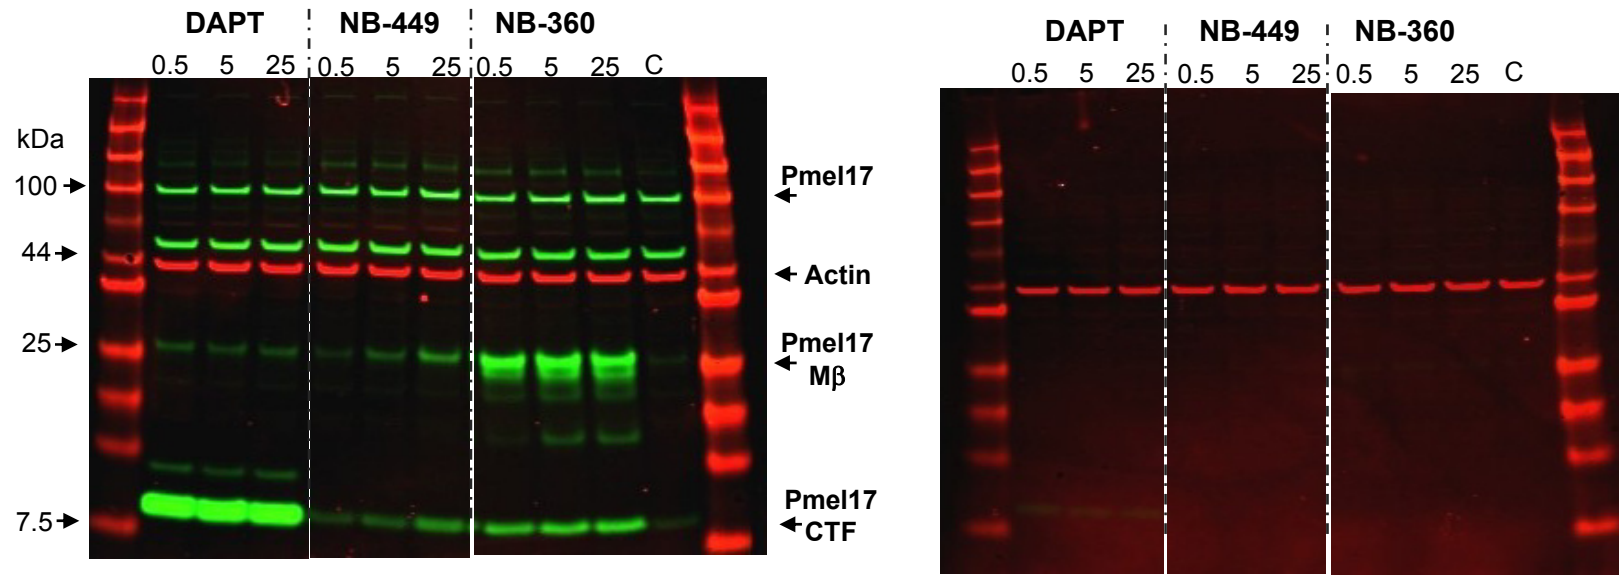

Supplementary Figure 2

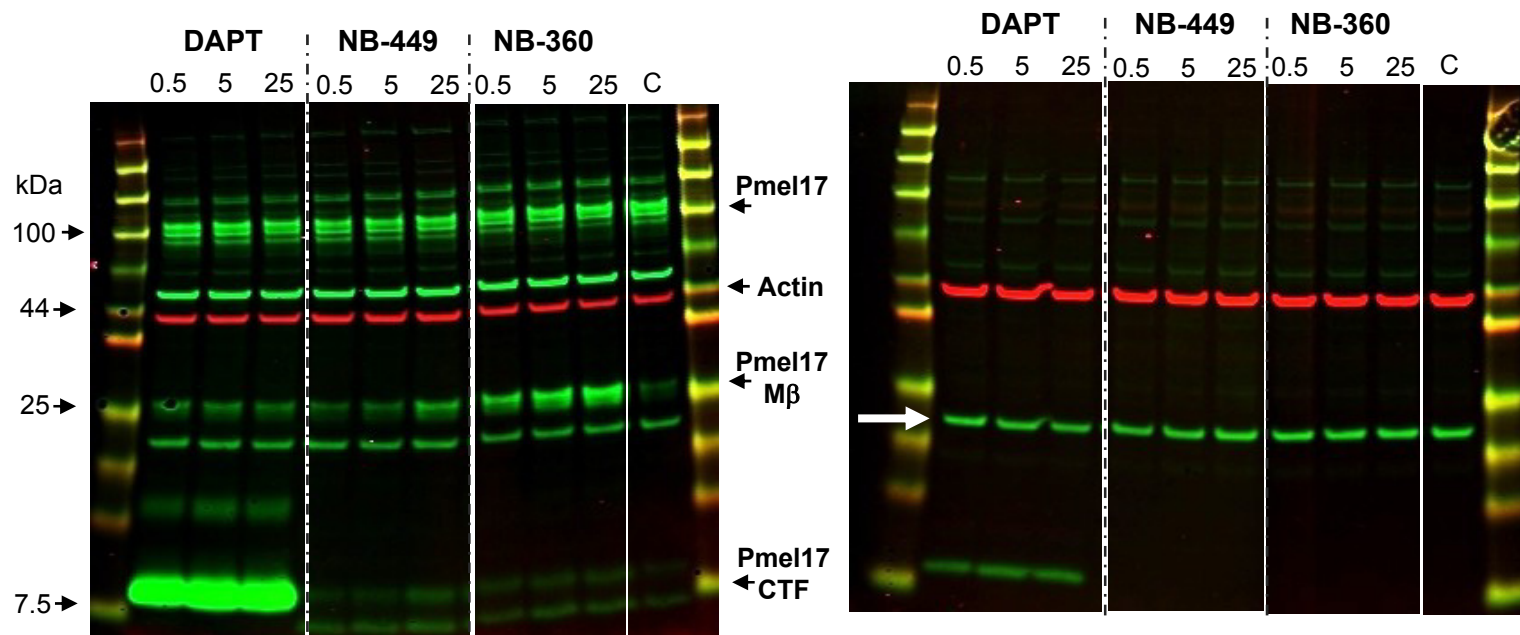

Supplementary Figure 3

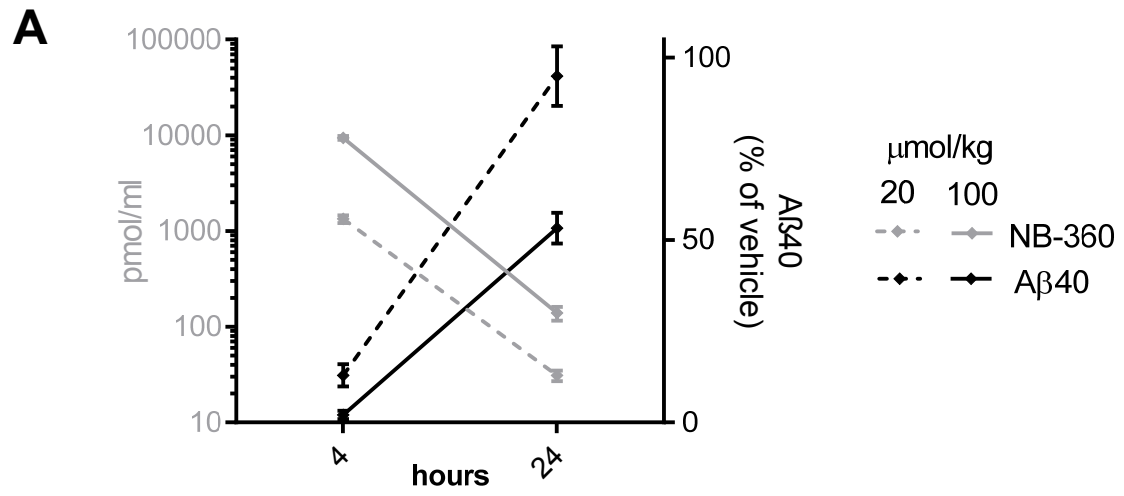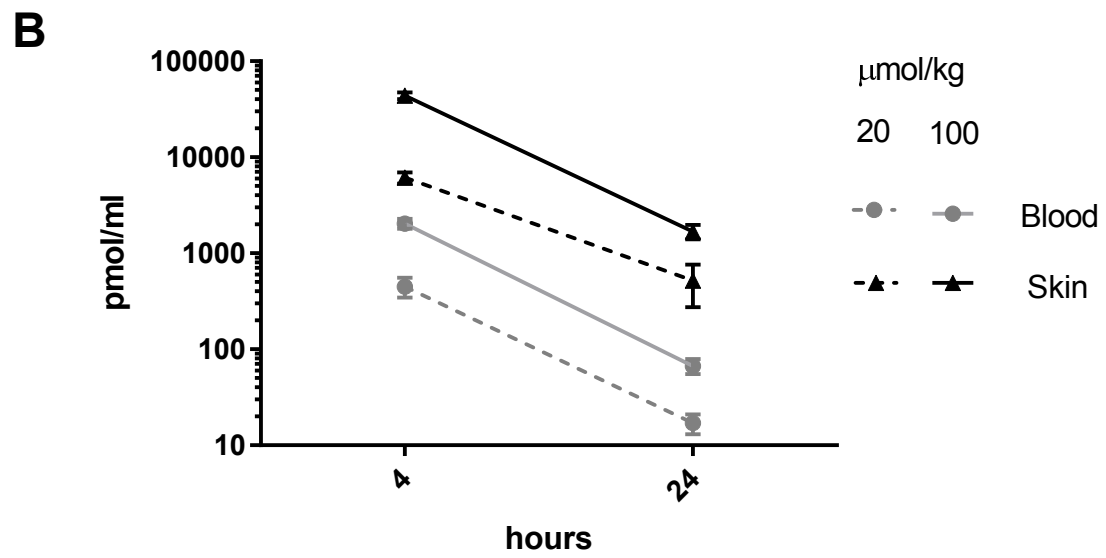

Supplementary Figure 4

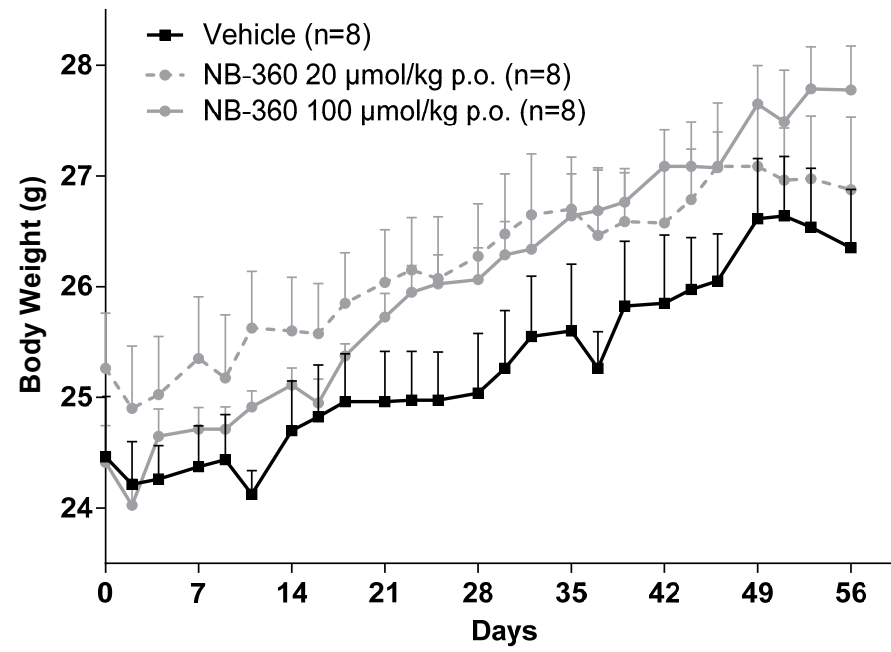

Supplementary Figure 5

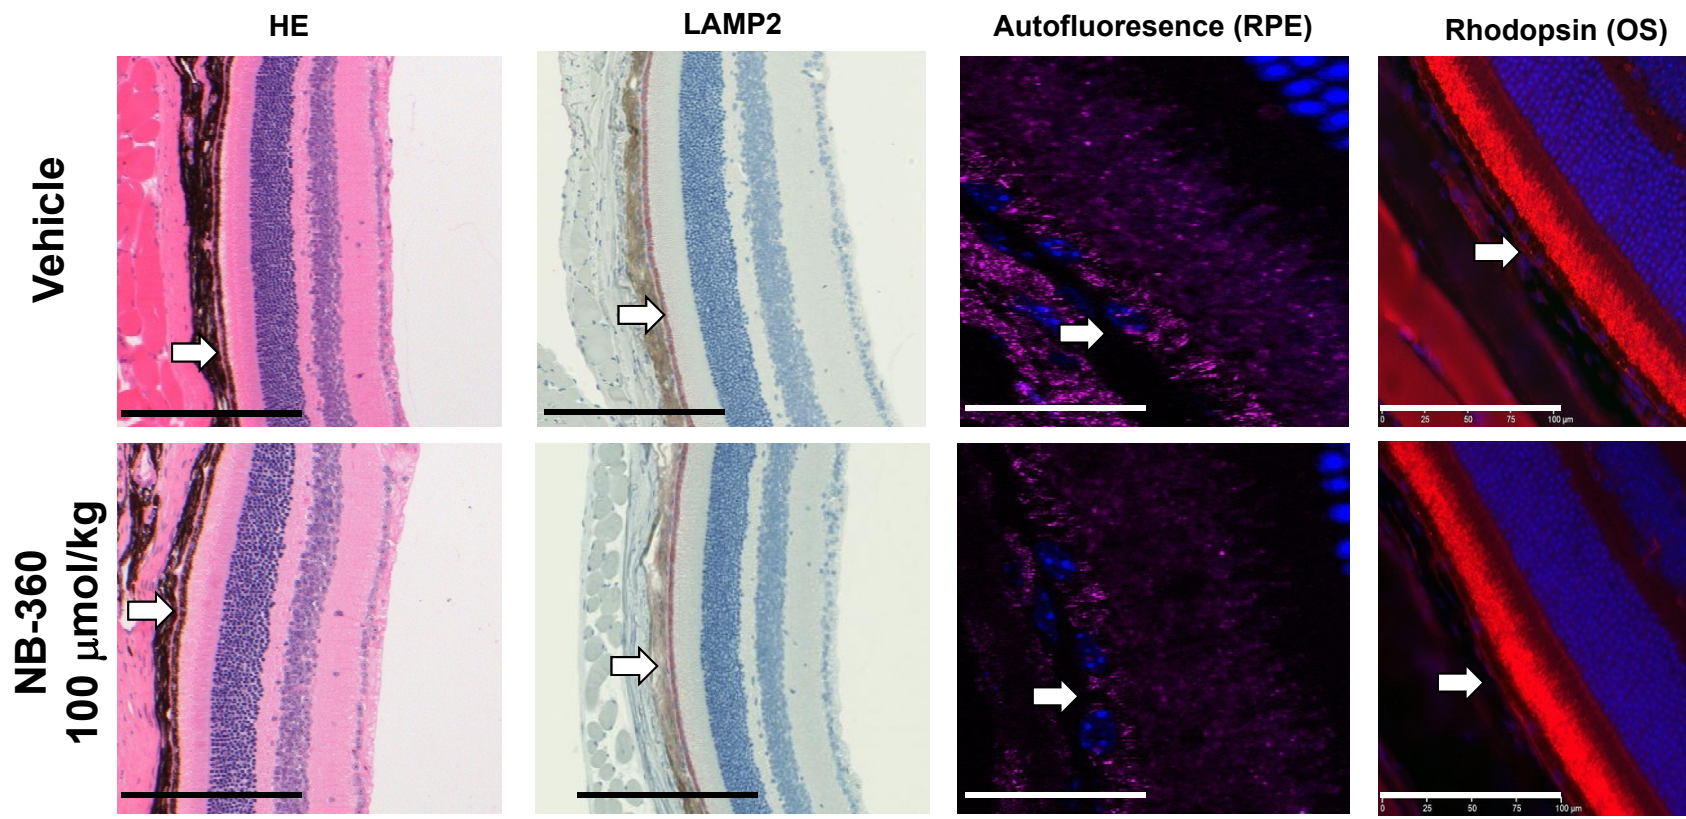

Supplementary Figure 6



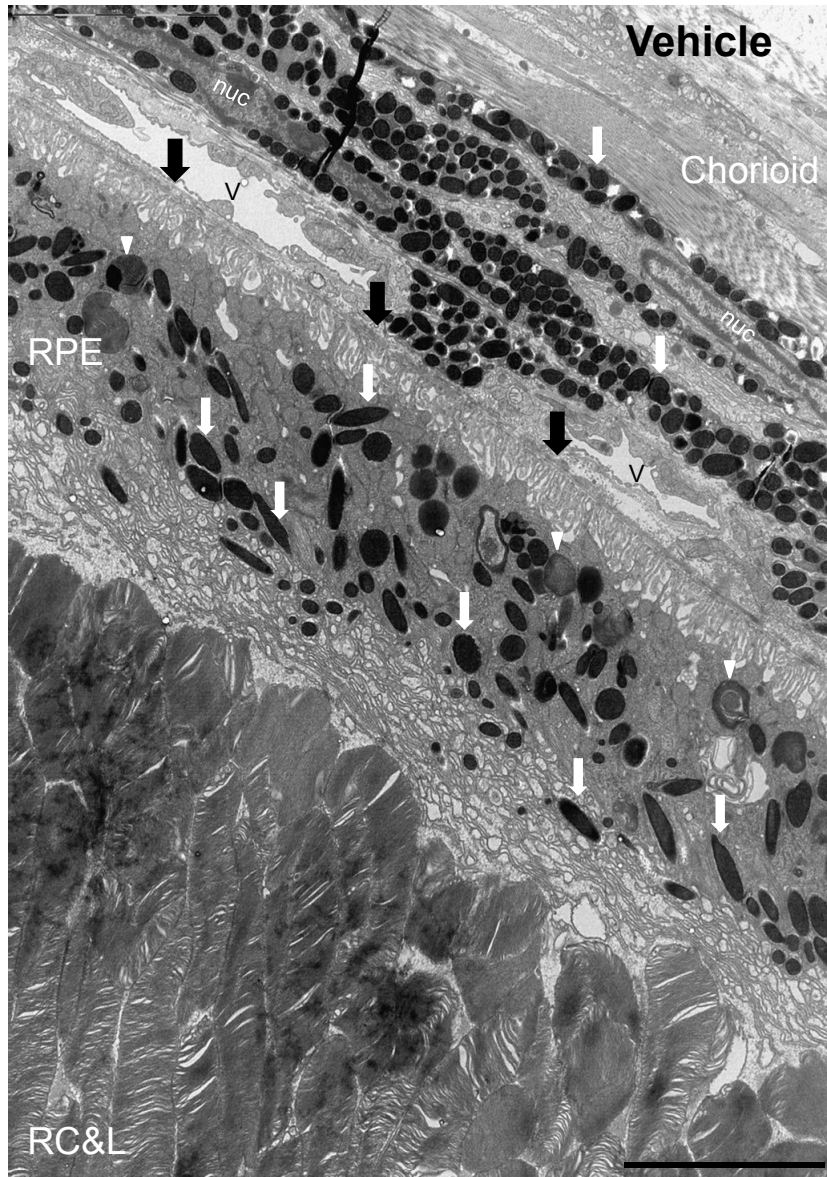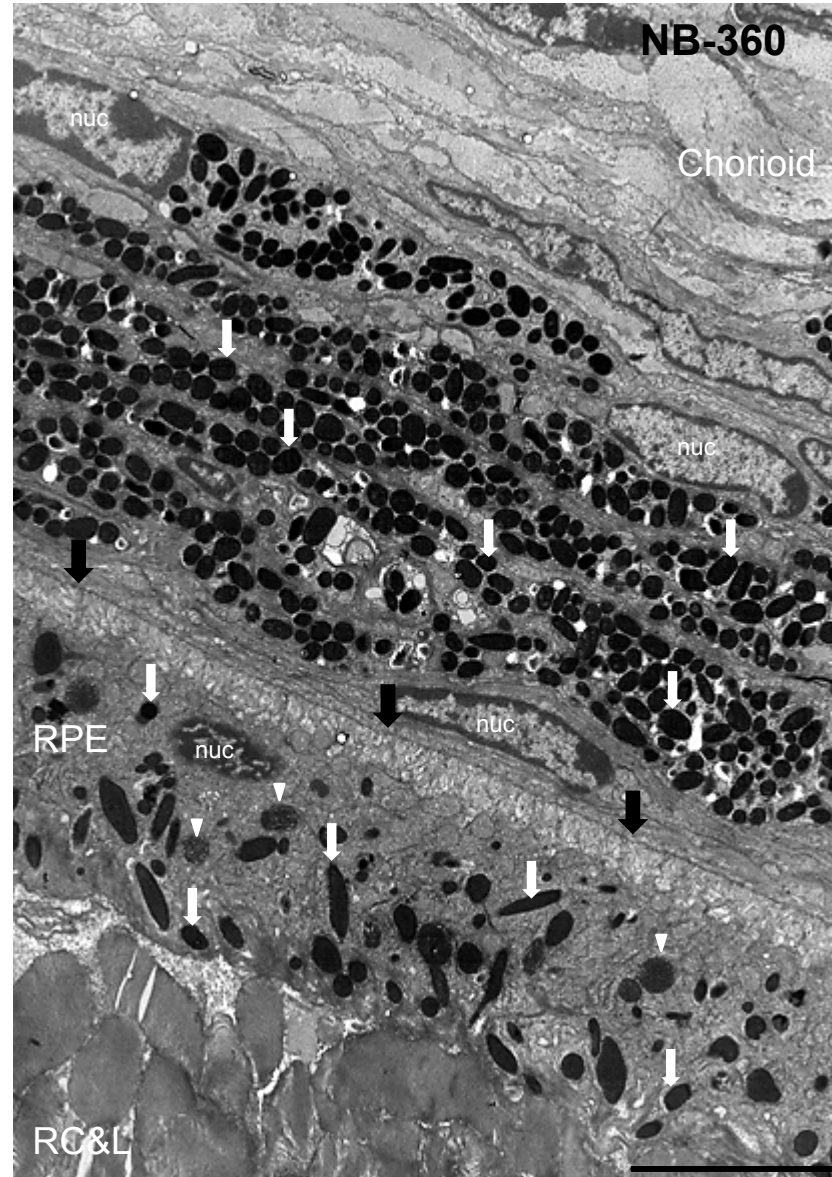

Supplementary Figure 7



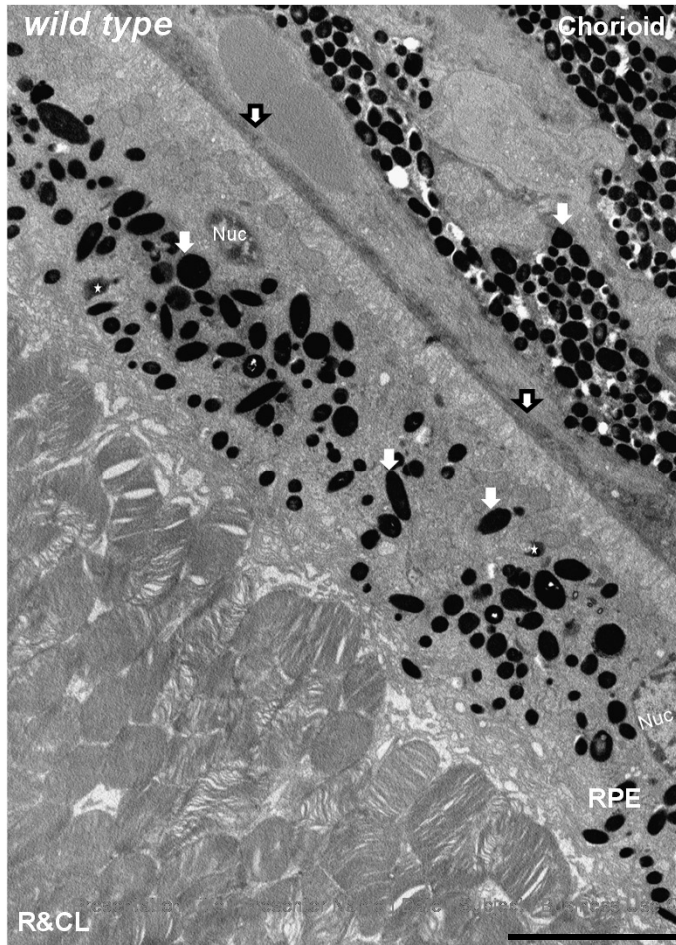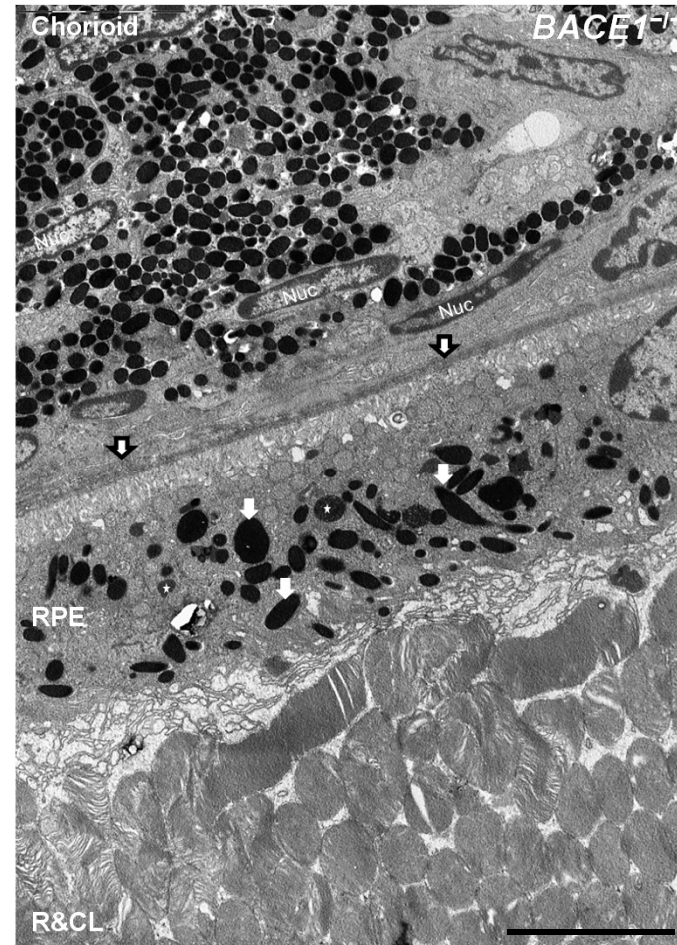

Supplementary Figure 8

**Supplementary Figure 1.** Intracellular ATP content of mouse (B16-F0) and human (MNT-1) melanocytes after 24 hours of treatment. Line graphs represent cellular ATP levels after treatment with increasing concentrations (0.2 $\mu$ M – 100 $\mu$ M) of the test compound compared to their untreated controls. Dotted line represents the non-cytotoxic threshold concentrations. Mean $\pm$ SD.

**Supplementary Figure 2.** Evaluation of the specificity of the PMEL17 antibody in B16-F0 mouse melanocytes. Immunoblot detecting PMEL17 full length as well as the proteolytic cleavage products thereof, PMEL17 Mb and PMEL17 CTF (C-terminal fragment) as indicated. B16-F0 cells were treated with compound at different concentrations as indicated (in  $\mu$ M). Loading control: b-actin. On the left, immunoblot performed with the PMEL17 antibody (2 $\mu$ g/ml) and competed with immunogenic peptide (200-fold molar excess). No unspecific bands were observed.

**Supplementary Figure 3.** Evaluation of the specificity of the PMEL17 antibody in MNT-1 human melanocytes. Immunoblot detecting PMEL17 full length as well as the proteolytic cleavage products thereof, PMEL17 Mb and PMEL17 CTF (C-terminal fragment) as indicated. MNT-1 cells were treated with compound at different concentrations as indicated (in  $\mu$ M). Loading control: b-actin. On the left, immunoblot performed with the PMEL17 antibody (2 $\mu$ g/ml) and competed with immunogenic peptide (200-fold molar excess). One unspecific band could be observed (white arrow).

**Supplementary Figure 4.** 8-week NB-360 treatment effects on brain Abeta40 lowering and the tissue exposure of NB-360 in blood, skin and brain in male C57BL/6J mice. **(A)** Dose-dependent brain levels of NB-360 after 4 and 24 hours at the end of the 8-week chronic daily treatment at 20 and 100 $\mu$ mol/kg shown in Fig. 1A and their respective vehicle-normalized (in %) Abeta40 lowering effect in the mouse brain. **(B)** Dose-dependent blood and skin levels of NB-360 after 4

and 24 hours at the end of the 8-week chronic daily oral treatment at 20 and 100µmol/kg depicted in Fig. 1A.

**Supplementary Figure 5.** Body weight monitoring of male C57BL/6J mice treated for 8 weeks with NB-360 as depicted in Fig. 1A.

**Supplementary Figure 6.** 6-week NB-360 treated female wildtype C57BL/6 mice of the APP51 line with 100µmol/kg show no eye pathology compared to vehicle. Hematoxylin and Eosin (HE), LAMP2 for lysosomes, autofluorescence for lipofuscin accumulation and rhodopsin for the rod outer segment. Arrow: retinal pigmented epithelium (RPE). scale bars – 100µm.

**Supplementary Figure 7.** 6-week NB-360 treated female wildtype C57BL/6 mice of the APP51 line with 100µmol/kg showed no eye ultrastructural changes in the RPE and choroid compared to vehicle. White arrow: pigment granules; white arrowheads: phagolysosomes; black arrows: Bruch's membrane; nuc – nucleus; RC&L – rod and cones layer; scale bars – 20µm

**Supplementary Figure 8.** 6-month old *bace1*<sup>-/-</sup> showed no ultrastructural changes in the RPE and choroid compared to wildtype. White arrow: pigment granules; white stars: phagolysosomes; black arrows: Bruch's membrane; nuc: nucleus; RC&L: rod and cones layer; scale bars – 20µm
